# Supplementary material for: Genome-wide analyses identify novel risk loci for cluster headache in Han Chinese residing in Taiwan
Source: PubMed Central journal article supplement (PMC9677903; doi:10.1186/s10194-022-01517-6), 2022-11-21

**Supplemental Figure 1. Quantile-quantile plot of the GWAS results of cluster headache.**

The horizontal axis shows  $-\log_{10} p$  values expected under the null distribution. The vertical axis shows observed  $-\log_{10} p$  values.

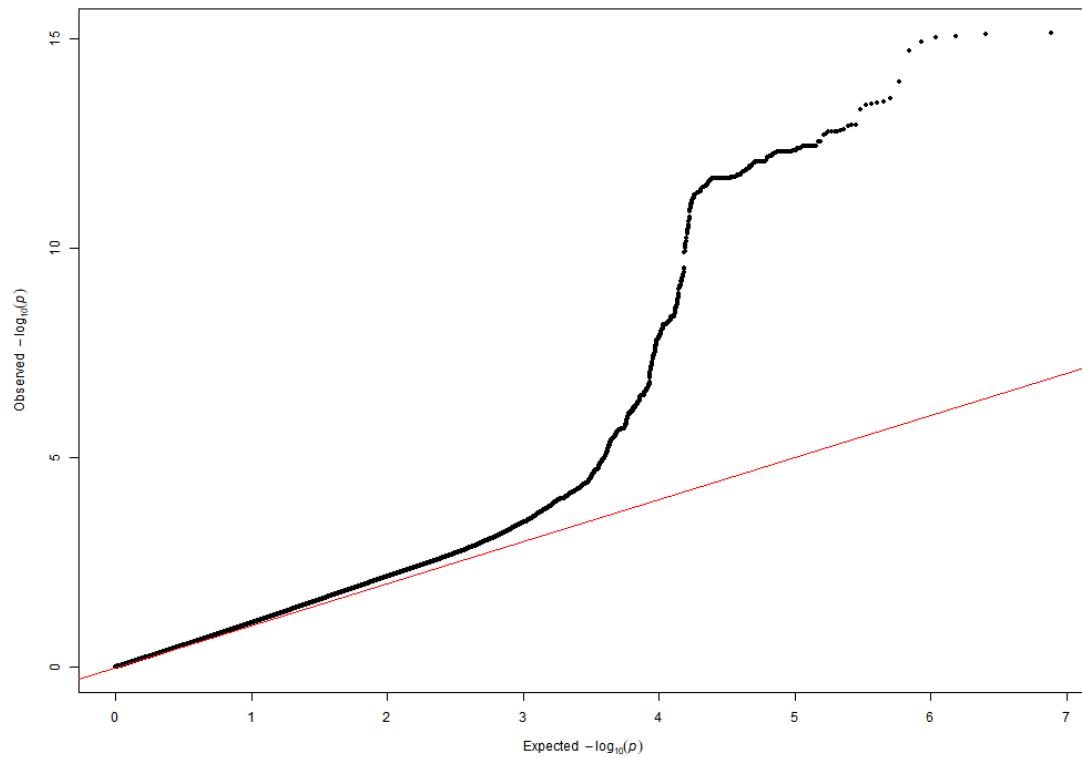

Supplement: 10194_2022_1517_MOESM2_ESM.pdf [file 10194_2022_1517_MOESM2_ESM.pdf]
