# Supplementary material for: Genome-wide analyses identify novel risk loci for cluster headache in Han Chinese residing in Taiwan
Source: PubMed Central journal article supplement (PMC9677903; doi:10.1186/s10194-022-01517-6), 2022-11-21

**Supplemental Figure 5. eQTL analysis by MetaXcan**

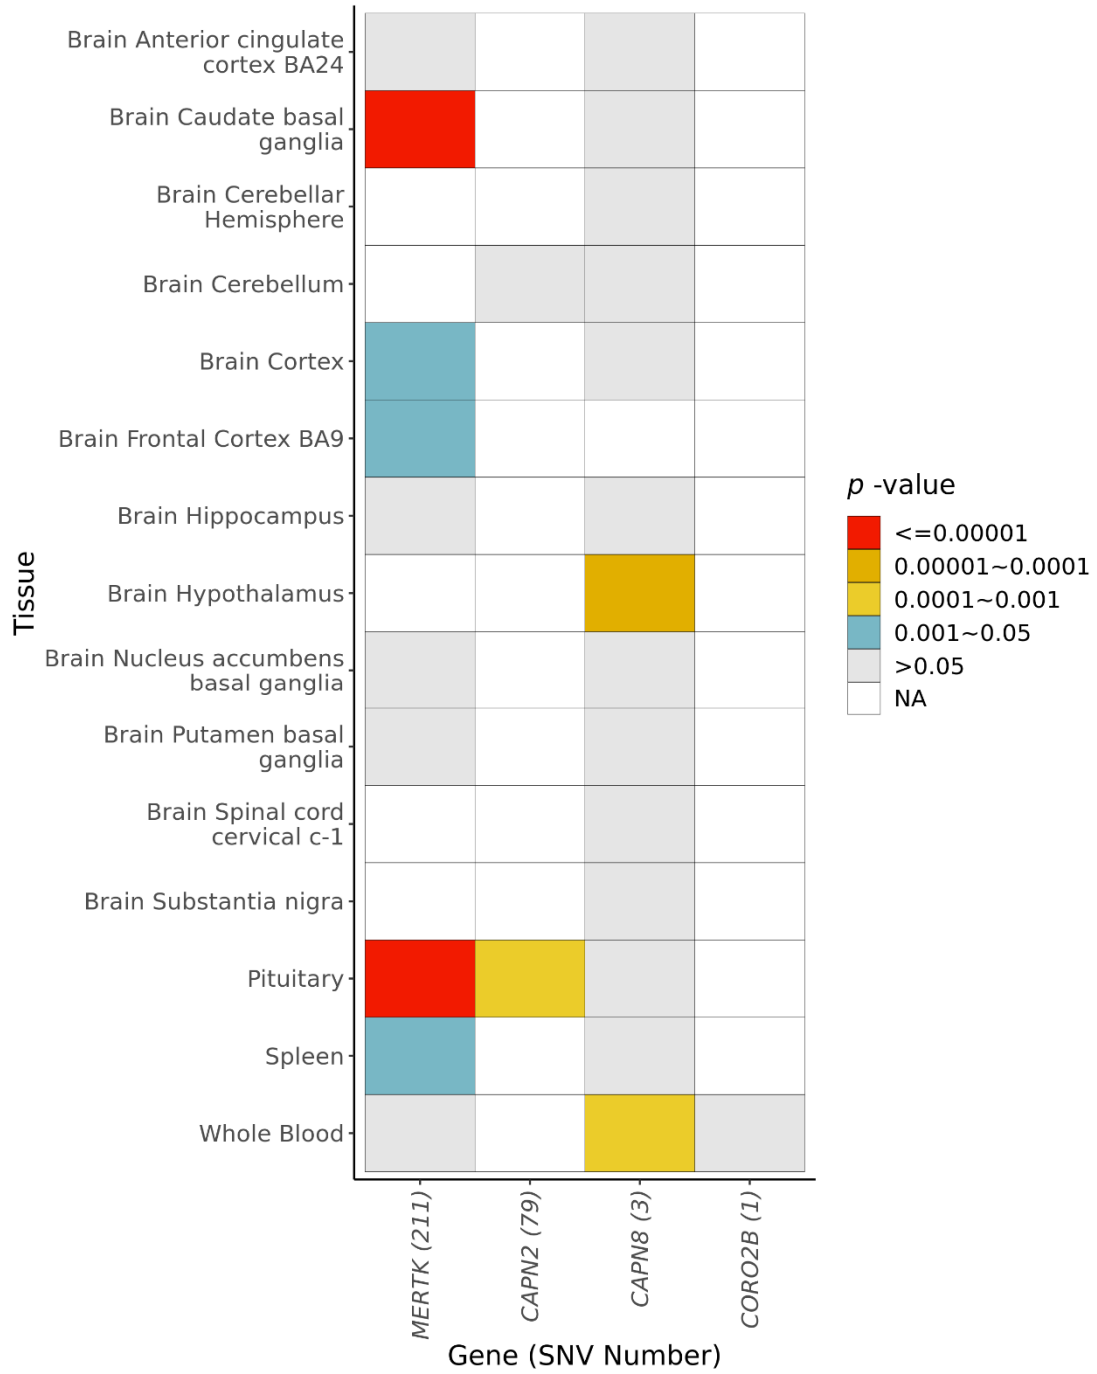

Supplement: 10194_2022_1517_MOESM7_ESM.pdf [file 10194_2022_1517_MOESM7_ESM.pdf]
