# Supplementary material for: Genome-wide analyses identify novel risk loci for cluster headache in Han Chinese residing in Taiwan
Source: J Headache Pain. 2022 Nov 21;23(1):147. doi: 10.1186/s10194-022-01517-6 (PMC9677903; doi:10.1186/s10194-022-01517-6)

**Supplemental Figure 3: Manhattan plot of the discovery cohort (A) and replication cohort (B).**

The horizontal axis shows the chromosomal position, and the vertical axis shows the significance of tested markers. The threshold for genome wide significance ( $p < 5 \times 10^{-8}$ ) is indicated by a red dash line.

(A)

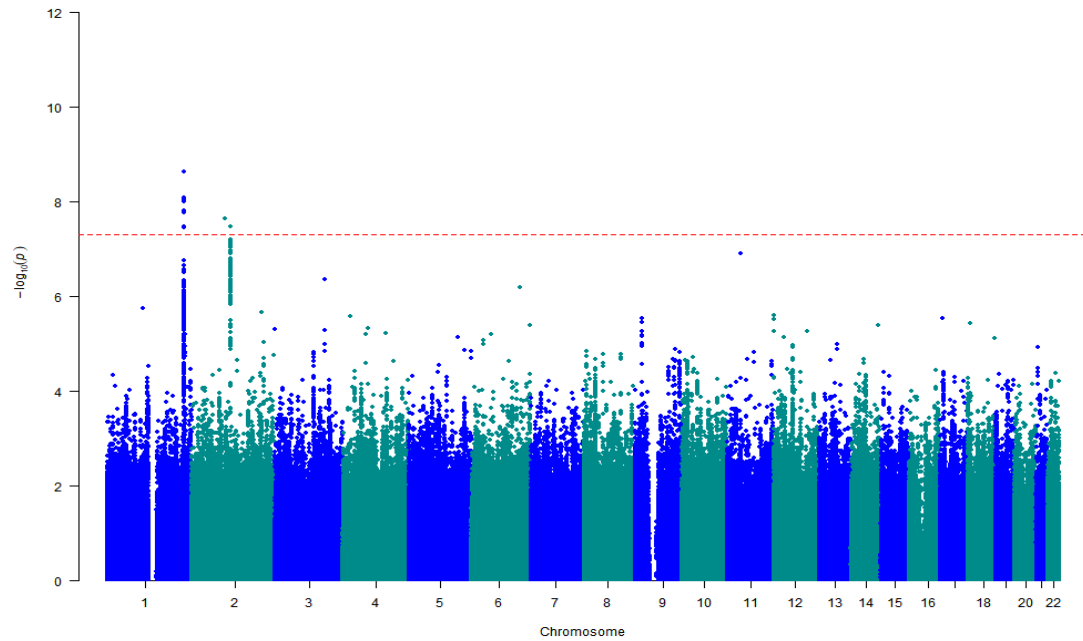

(B)

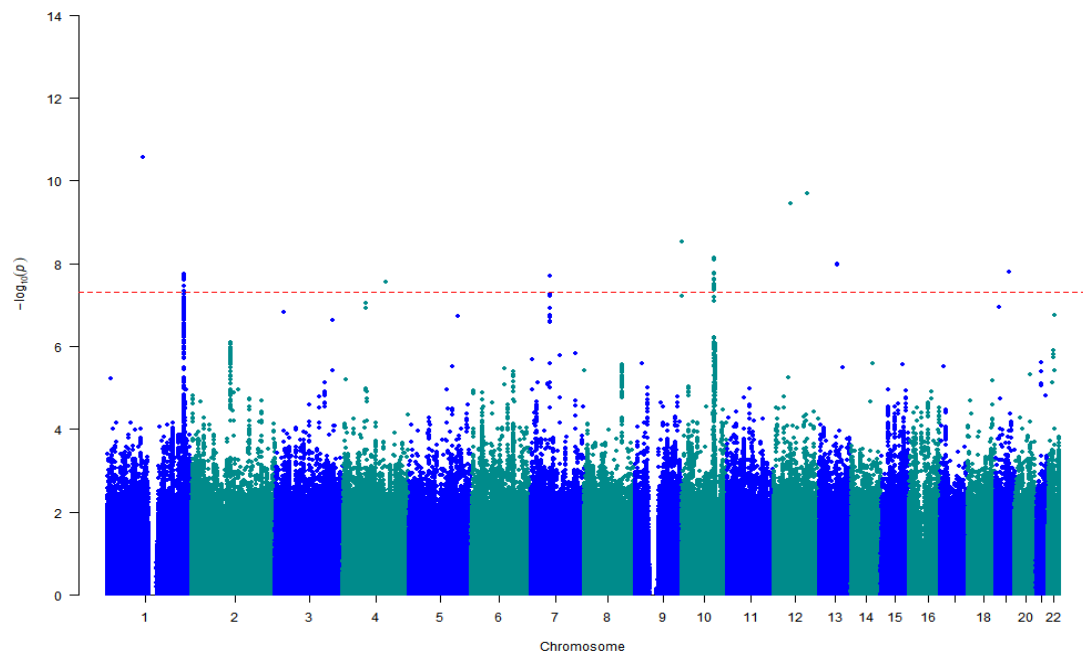

Supplement: Supplementary file 4 — Additional file 4: Supplemental Figure 3. Manhattan plot of the discovery cohort (A) and replication cohort (B). [file 10194_2022_1517_MOESM4_ESM.pdf]
