# Supplementary material for: Genome-wide analyses identify novel risk loci for cluster headache in Han Chinese residing in Taiwan
Source: J Headache Pain. 2022 Nov 21;23(1):147. doi: 10.1186/s10194-022-01517-6 (PMC9677903; doi:10.1186/s10194-022-01517-6)

**Supplemental Figure 6. GIGSEA pathway analysis of the genes relevant to cluster headache GWAS variants.**

We employed the weighted linear regression model of the GIGSEA with empirical p-values incorporating 1,000 permutations for (A-C) Gene Ontology (GO) ((A)GOBP (B)GOCC (C)GOMF), (D) Kyoto Encyclopedia of Genes and Genomes (KEGG), and (E) Reactome (REAC). The Bayes factor was used to correct the multiple hypothesis testing.

**A**

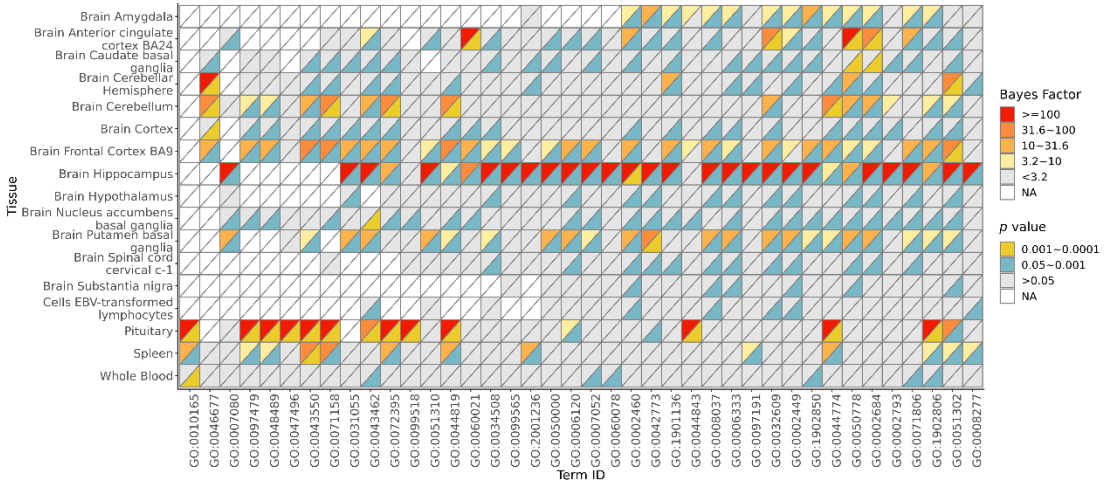

**B**

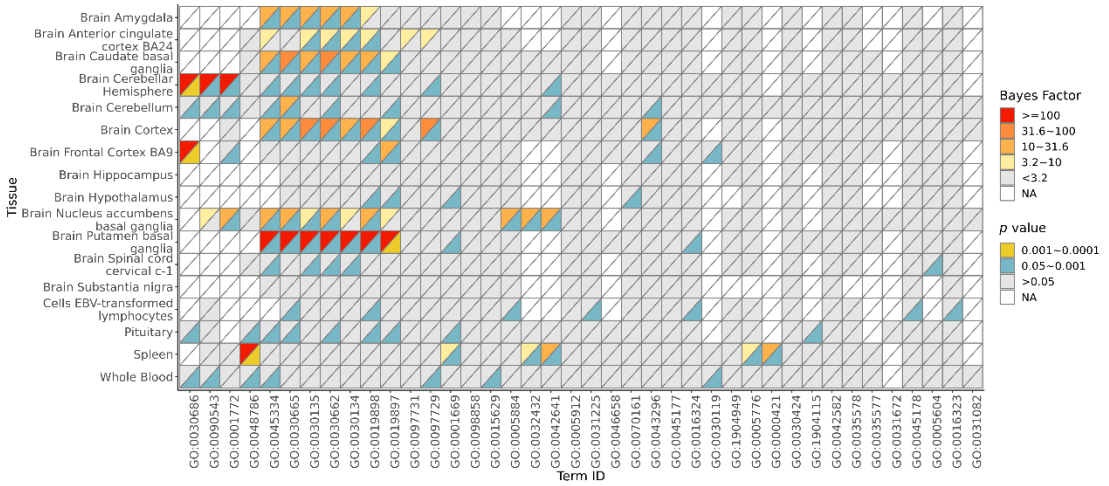

C

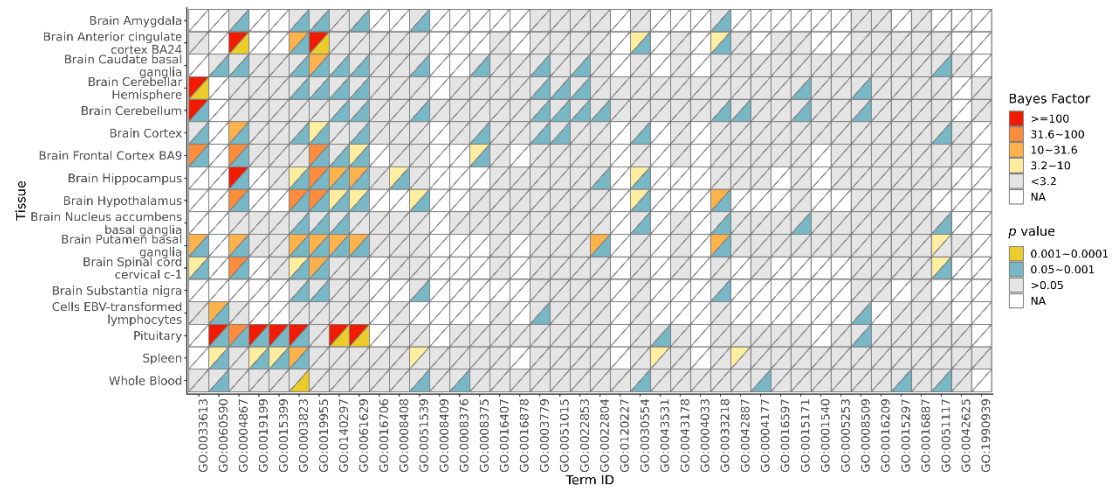

D

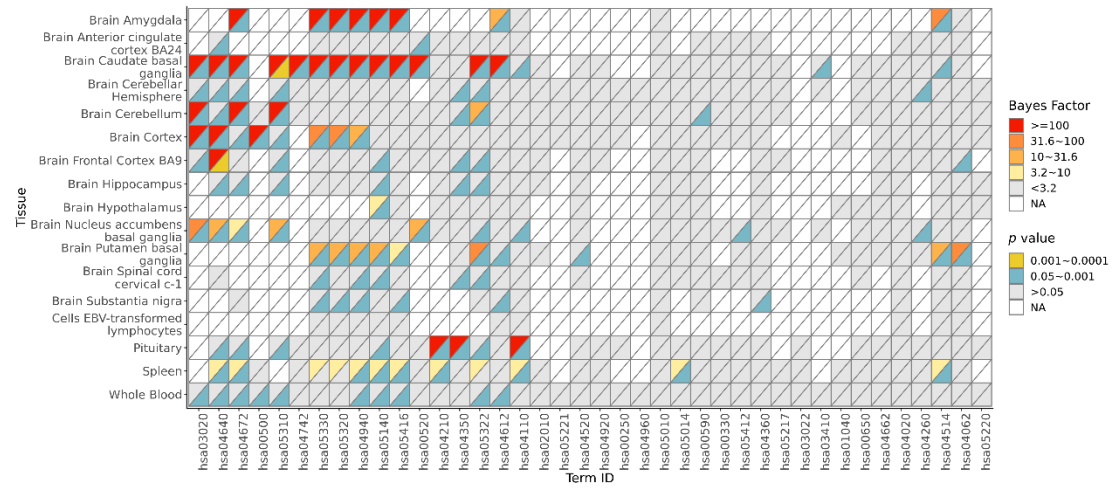

E

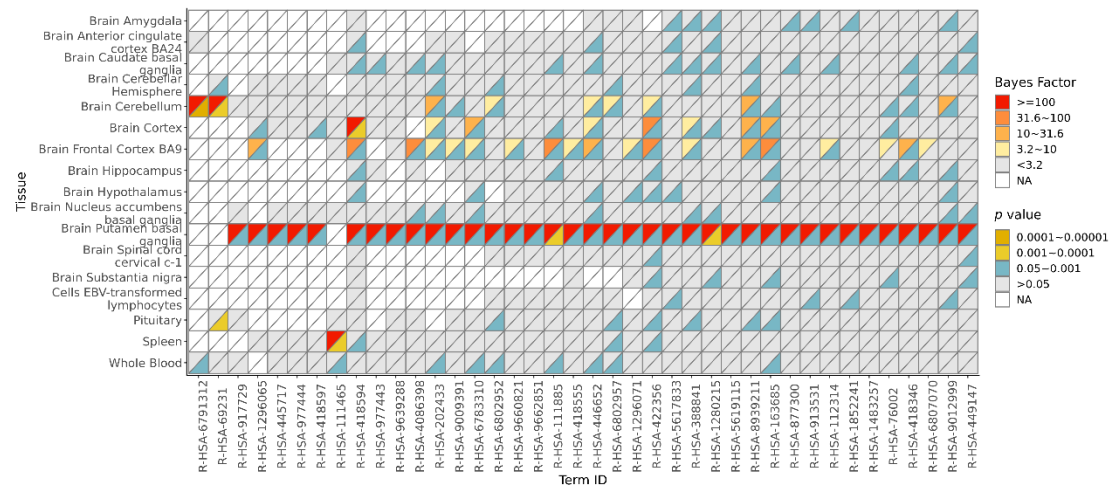

Supplement: Supplementary file 9 — Additional file 9: Supplemental Figure 6. GIGSEA pathway analysis of the genes relevant to cluster headache GWAS variants. [file 10194_2022_1517_MOESM9_ESM.pdf]
